# Supplementary material
Source: Research Square preprint supplement (doi:10.21203/rs.3.rs-10062535/v1)
Supplement: Supplementary file 1 [file 07e209eae794f24dc98103af.docx]

**Suppl Table 1**: Reference values for preterm and term infants according to age

|  | **Dte R** (mm) | **Dti R (mm)** | **DTF R (%)** | **Dte L (mm)** | **Dti L (mm)** | **DTF L (%)** |
| --- | --- | --- | --- | --- | --- | --- |
| 31-33 wk,  DOL1 [1] | 1.2  (1.1-1.4) | 1.6  (1.5‐1.9) | 33  (24‐46) | 1.2  (1.1‐1.6) | 1.6  (1.3‐2.1) | 32  (26‐39) |
| 39±1.2 wk  DOL 1 [2] | 1.80 ±0.34 | 2.34±0.46 | 30.3±13.5 | 1.67±0.49 | 2.12±0.56 | 29.0±11.1 |
| 7 months  1 year [3] | 1.67 ± 0.30 | 2.09 ± 0.40 | 25.2 ± 8.3 |  |  |  |

**References**

1. Alonso-Ojembarrena A, Ruiz-González E, Estepa-Pedregosa L, Armenteros-López AI, Segado-Arenas A, Lubián-López SP. Reproducibility and reference values of diaphragmatic shortening fraction for term and premature infants. *Pediatr Pulmonol*. 2020;55(8):1963-1968.
2. Koutras I, [Chatziioannidis](https://pubmed.ncbi.nlm.nih.gov/?sort=date&size=200&term=Chatziioannidis+I&cauthor_id=41863637)I, [Kontou](https://pubmed.ncbi.nlm.nih.gov/?sort=date&size=200&term=Kontou+A&cauthor_id=41863637) A, [Pouliakis](https://pubmed.ncbi.nlm.nih.gov/?sort=date&size=200&term=Pouliakis+A&cauthor_id=41863637) A, Sarafidis K. Combined diaphragm and lung ultrasound profiling in healthy full-term neonates: a study of early postnatal function. Eur J Pediatr 2026;185(4):196.
3. Duyndam A, Smit J, Heunks L, et al. Reference values of diaphragmatic dimensions in healthy children aged 0-8 years. *Eur J Pediatr*. 2023;182(6):2577-2589. doi:10.1007/s00431-023-04920-6
